# Supplementary material
Source: publisher site journal article supplement (https://www.dovepress.com/article/503326)
Supplement: Supplementary file 1 [file get_supplementary_file.php]

**Supplementary Figures**

**Figure Legend**

*Figure S1*


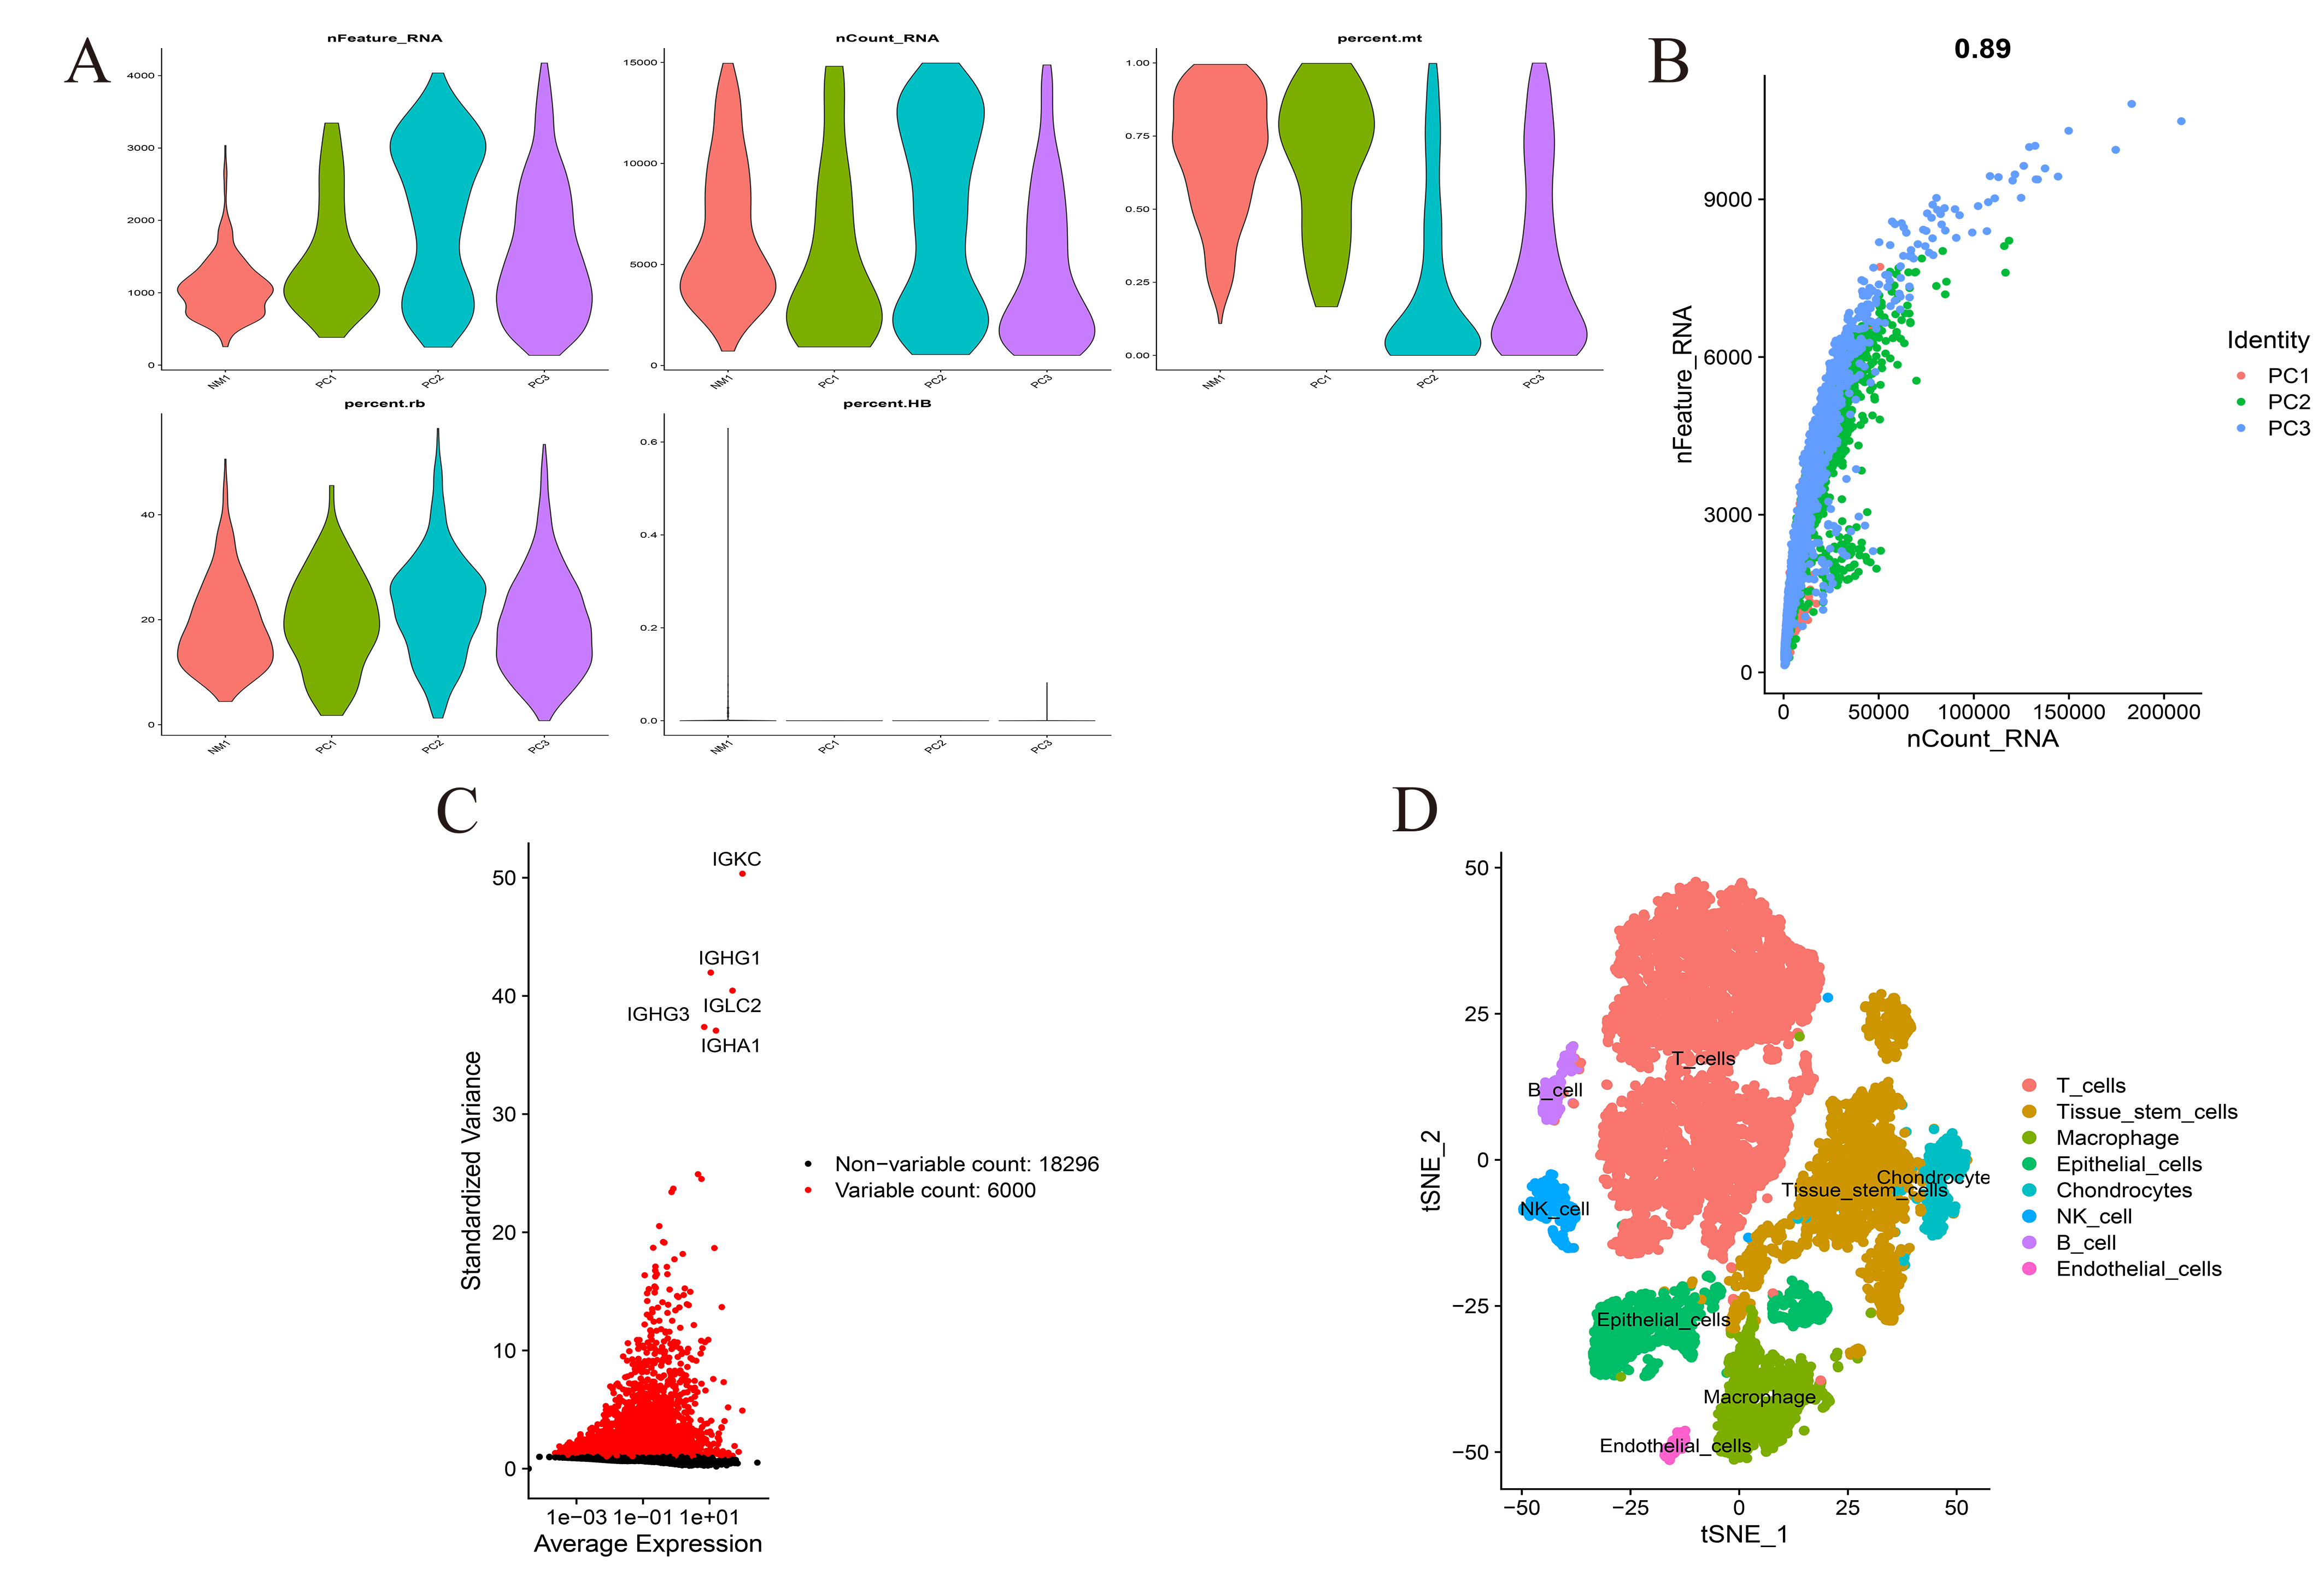


Single-cell analysis. (A) The quantity of each sample's gene expression per cell, as well as the percentage of erythrocyte, ribosomal, and mitochondrial genes. (B) Throughout the three PCs, cells were dispersed equally. A correlation value of 0.89 is obtained. (C) We selected 6000 highly variable genes from all genes and marked them in red. (D) Cells were identified as endothelial cells, B cells, NK cells, macrophages, tissue stem cells, T cells, and chondrocytes.

*Figure S2*


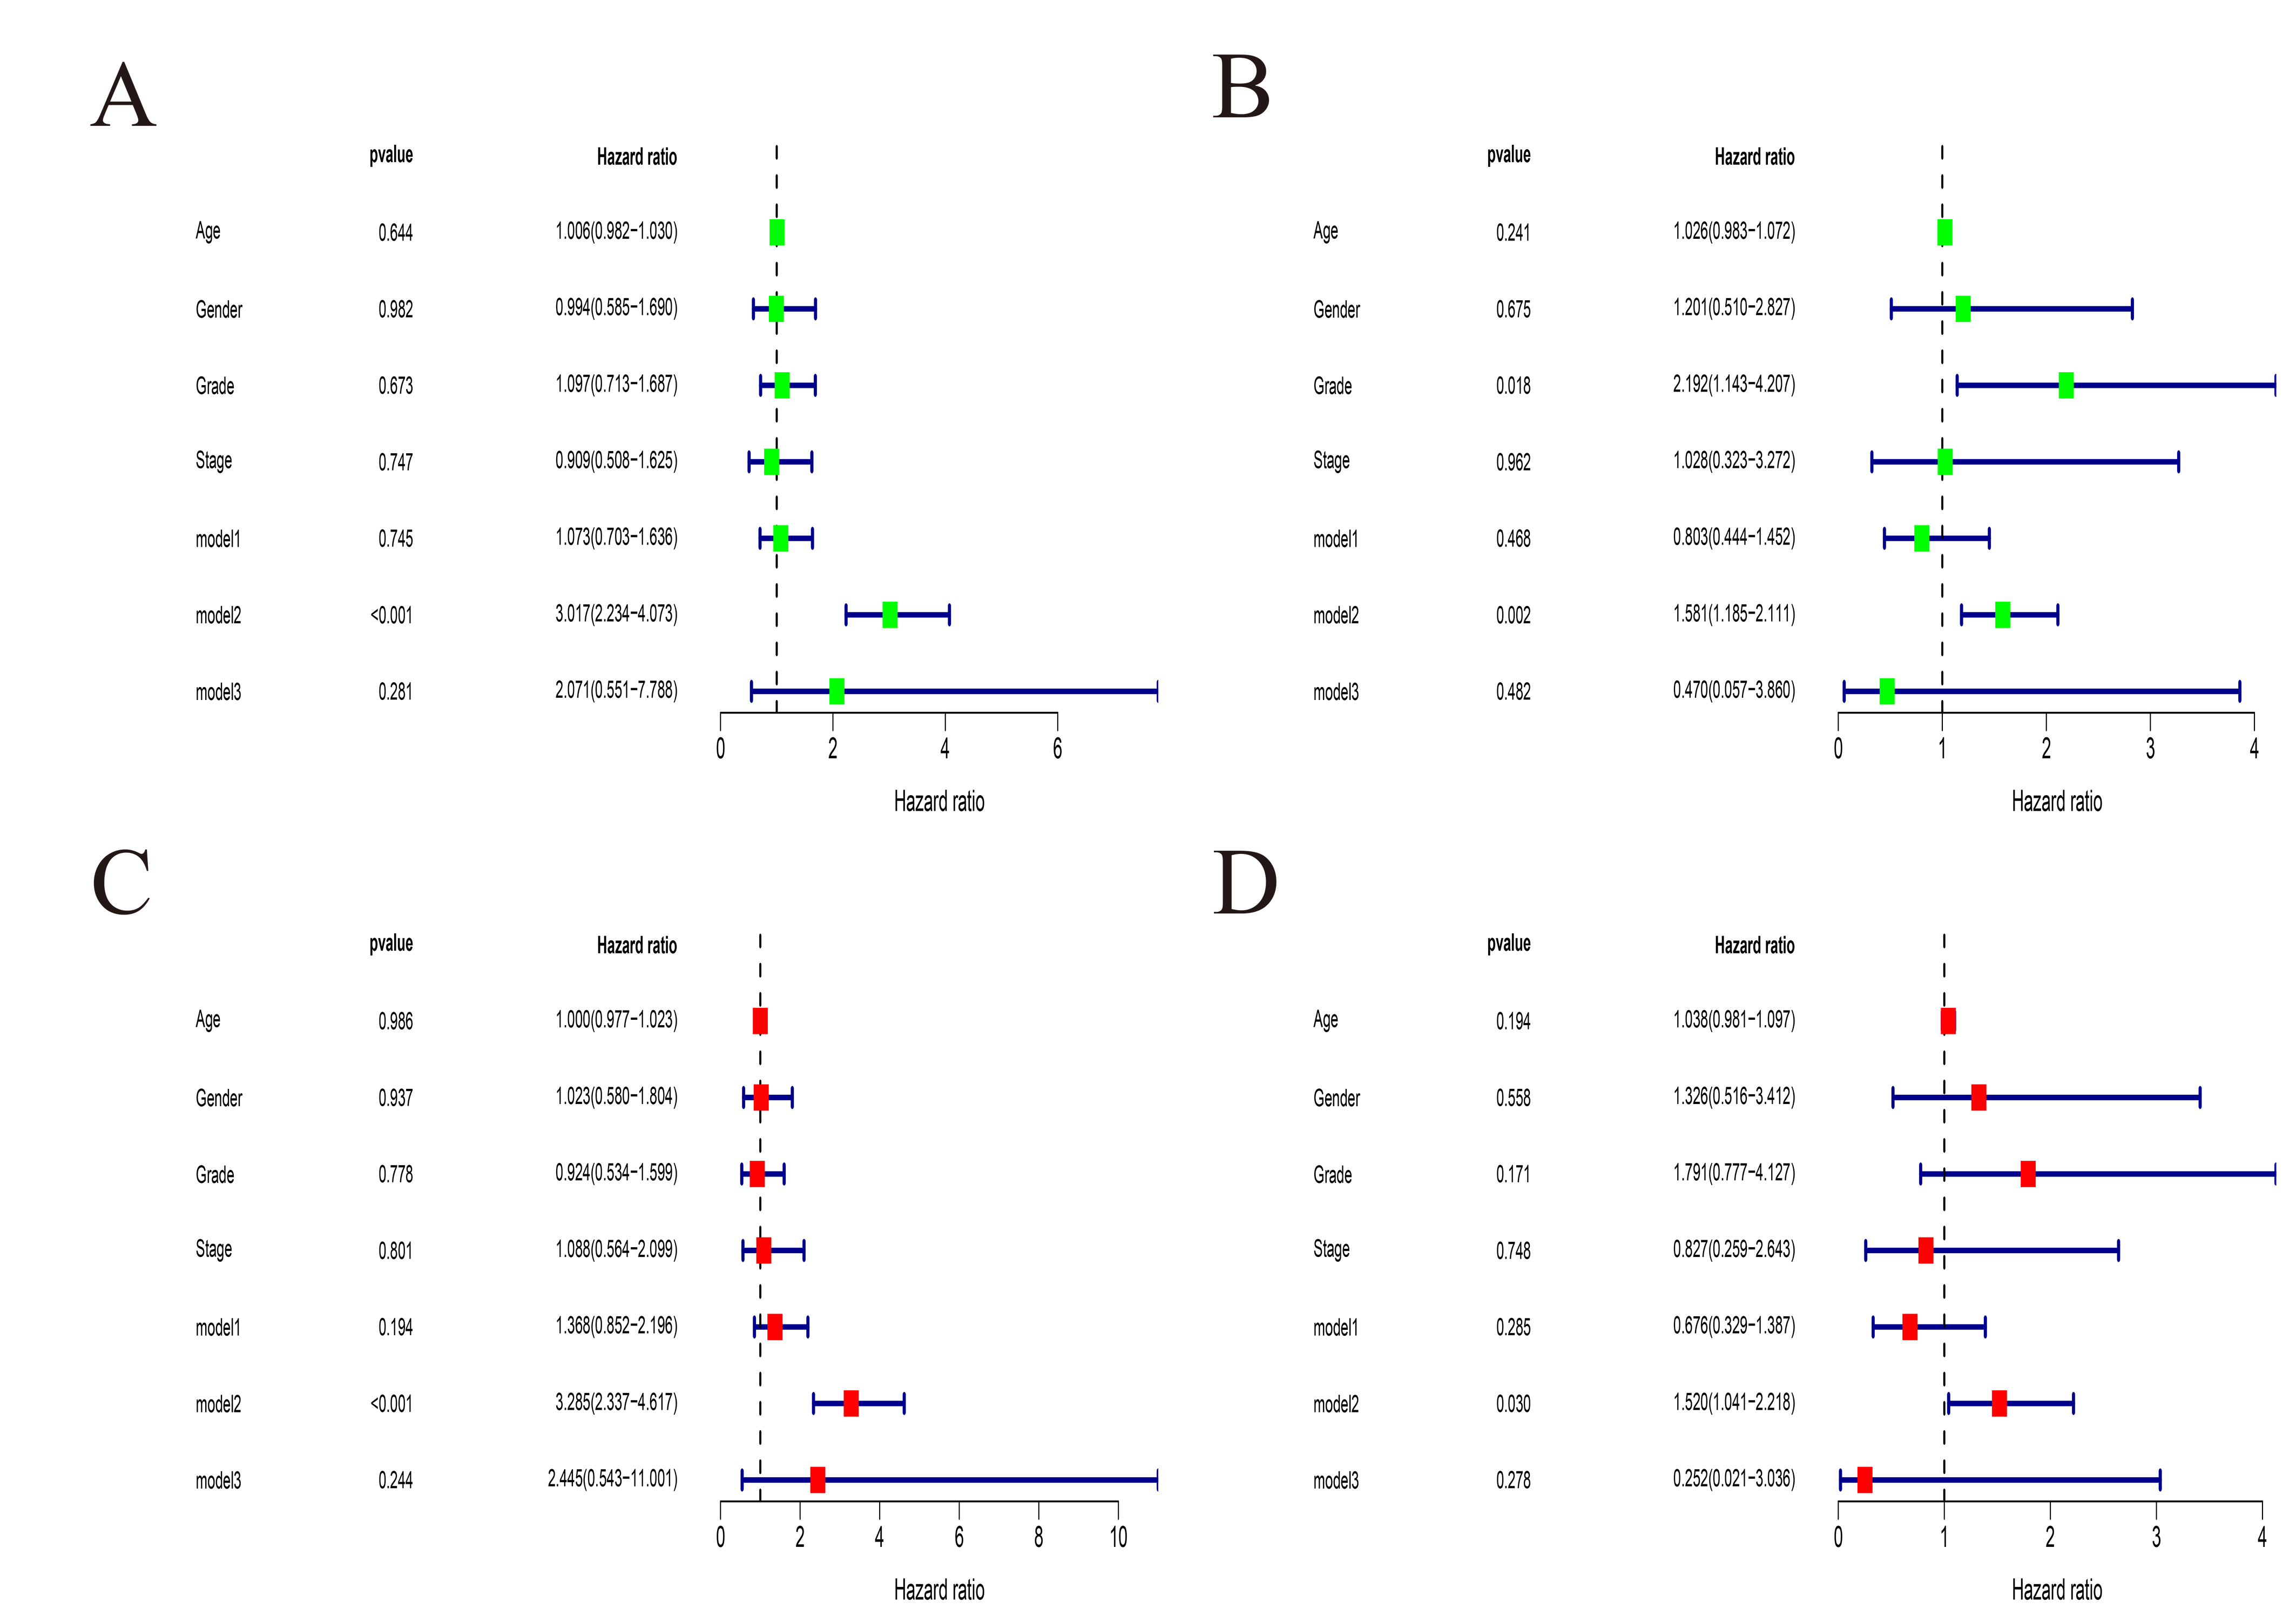


Independent prognostic analysis. Univariate (A, B) and multivariate (C, D) COX regression analyses showed that combined score was superior to any single model for pancreatic cancer in training (A, C) and test (B, D) cohorts.

*Figure S3*


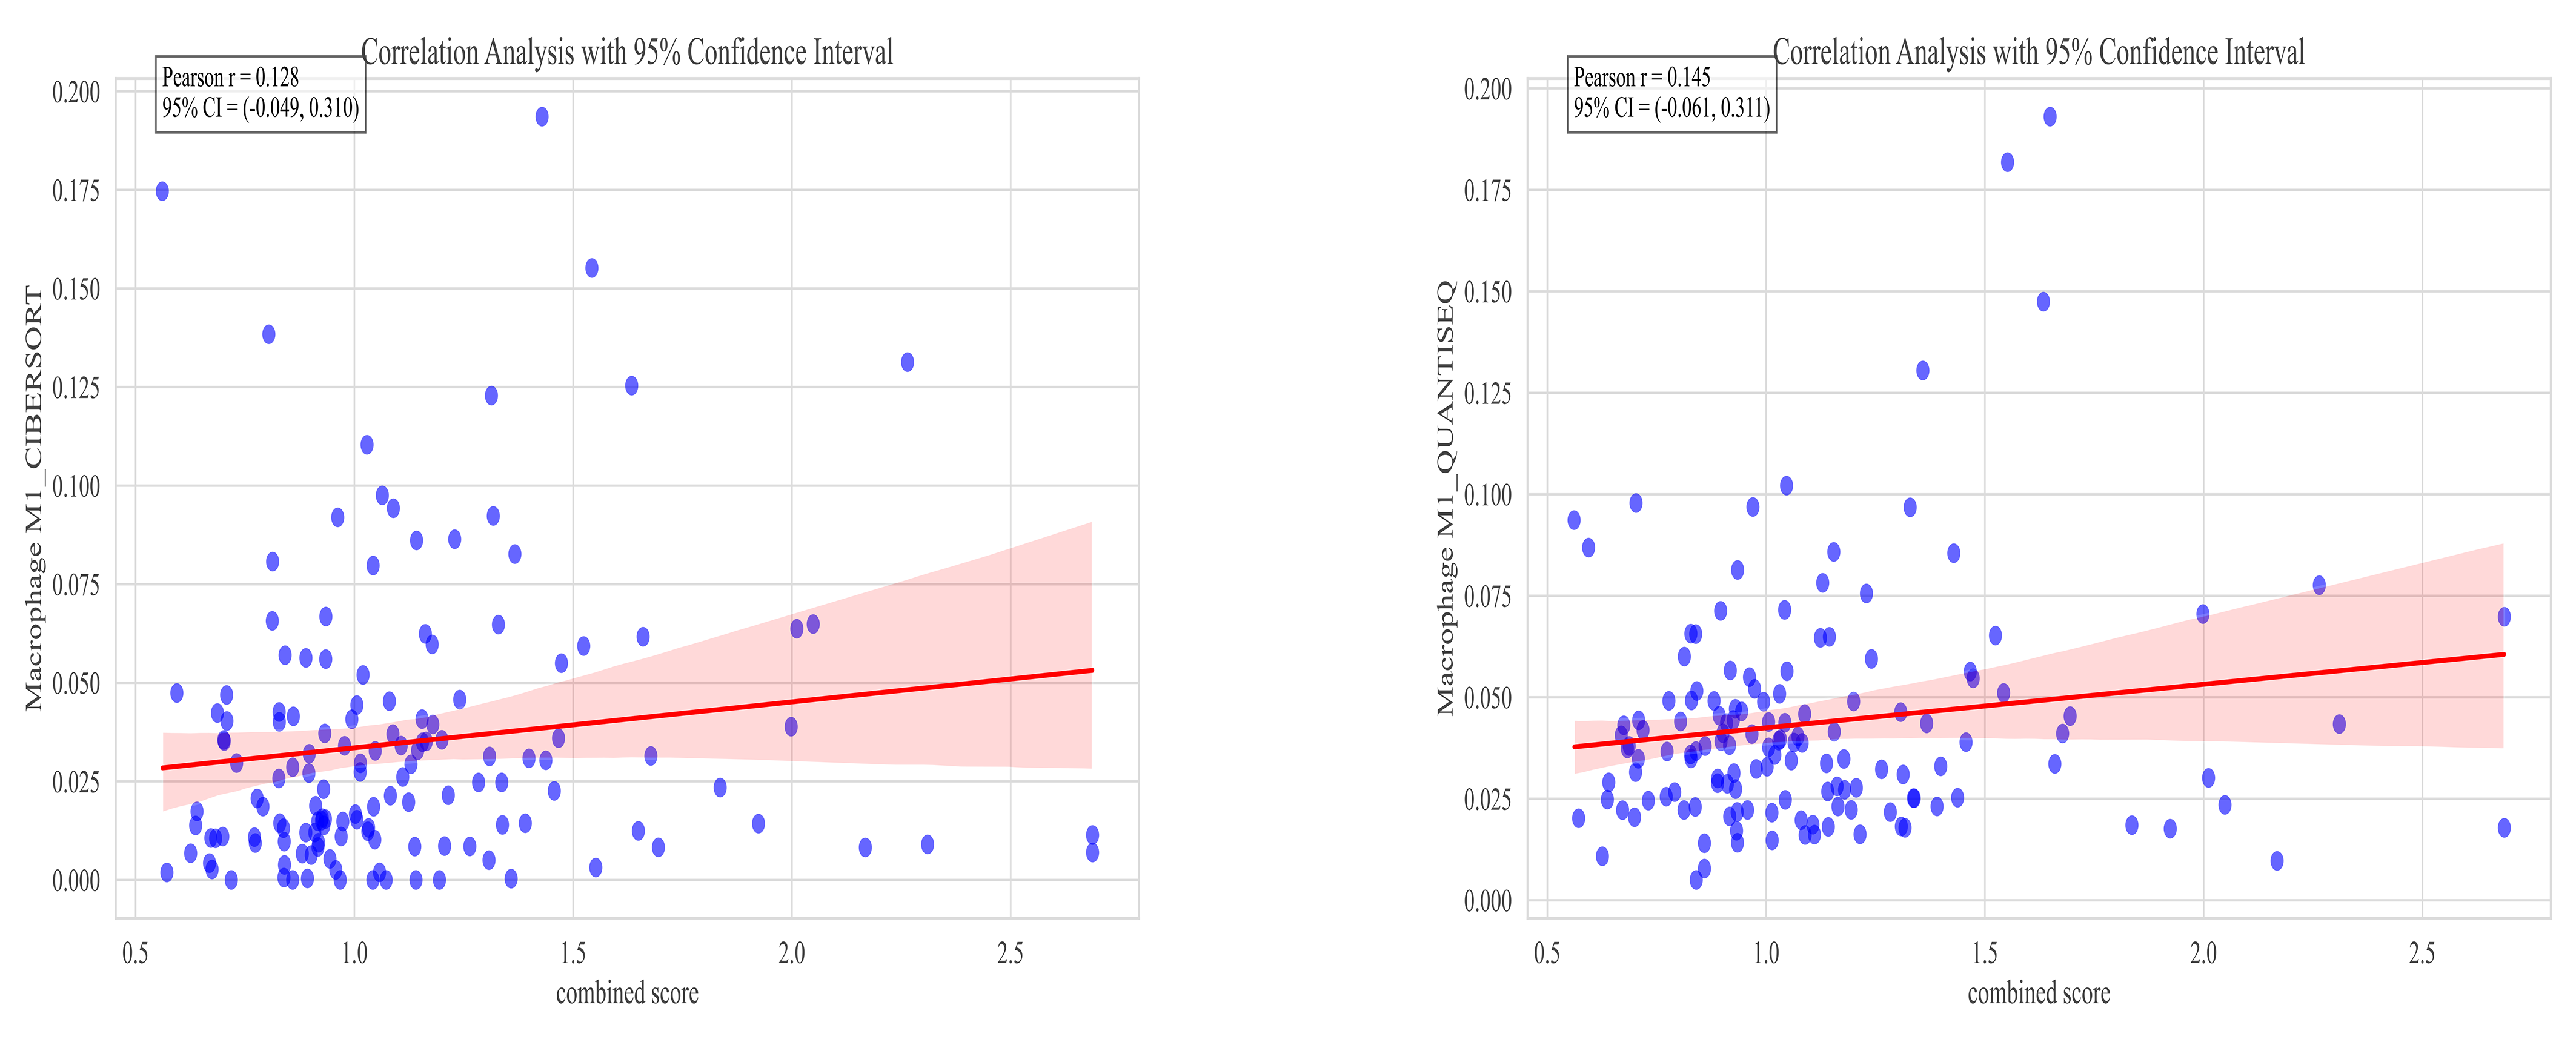


Pearson correlation coefficient. Pearson correlation coefficient showed that macrophage M1 cells and model scores were positively correlated.
